# Supplementary material for: Hypoxia-selective inhibition of angiogenesis development by NAMI-A analogues
Source: PubMed Central journal article supplement (PMC5116311; doi:10.1007/s10534-016-9974-9), 2016-11-03
Supplement: 10534_2016_9974_MOESM1_ESM.pdf [file 10534_2016_9974_MOESM1_ESM.pdf]

## Supplementary Material

### Selective-hypoxia inhibition of angiogenesis development by NAMI-A analogues

Maria Oszajca<sup>a,\*</sup>, Guillaume Collet<sup>b</sup>, Grażyna Stochel<sup>a</sup>, Claudine Kieda<sup>b,c,\*</sup>, Małgorzata Brindell<sup>a</sup>

<sup>a</sup> Faculty of Chemistry, Jagiellonian University, Ingardena 3, 30-060 Kraków, Poland

<sup>b</sup> Centre for Molecular Biophysics, Cell Recognition and Glycobiology, UPR4301-CNRS, rue Charles Sadron, Orléans 45071, France

<sup>c</sup> Malopolska Biotechnology Centre, Jagiellonian University, Kraków, Poland

\*Corresponding author e-mail address: maria.oszajca@chemia.uj.edu.pl, [claudine.kieda@cnrs-orleans.fr](mailto:claudine.kieda@cnrs-orleans.fr)

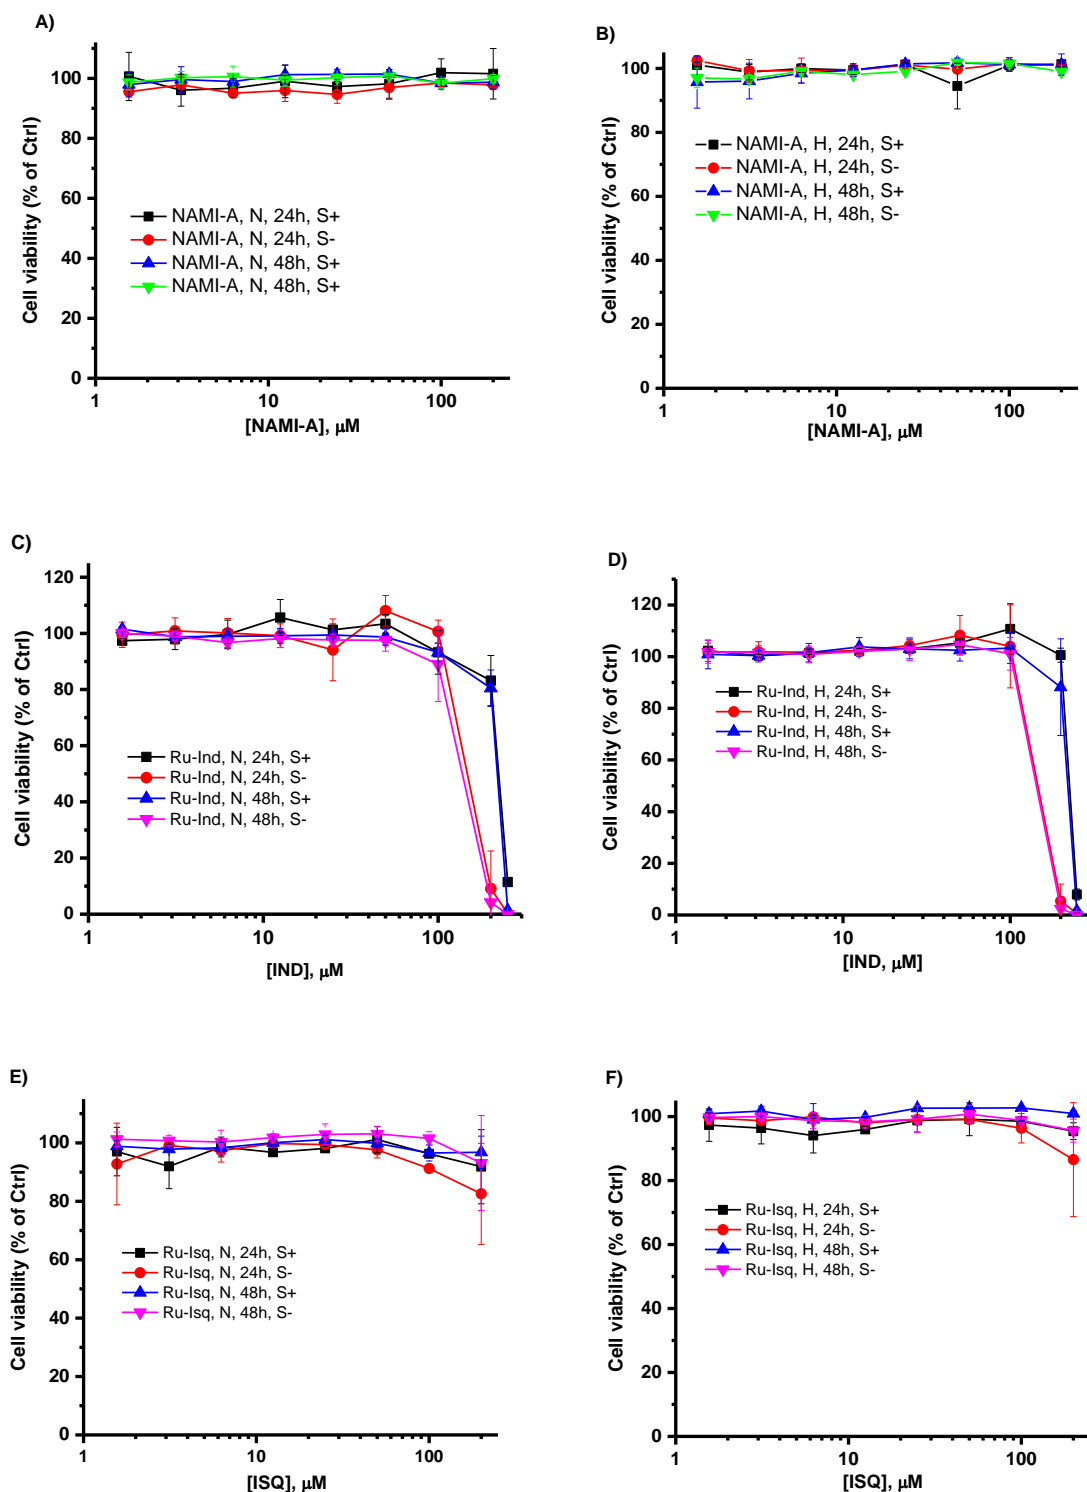

**Fig. S1.** Cytotoxic effect of studied compounds on HSkEC in A), C) and E) normoxic (N) and B), D) and F) hypoxic (H) conditions, A), B) - NAMI-A -  $[\text{H}_2\text{Im}][\text{trans-RuCl}_4(\text{HIm})(\text{DMSO})]$ , C), D) - Ru-Ind -  $[\text{H}_2\text{Ind}][\text{trans-RuCl}_4(\text{HInd})(\text{DMSO})]$ , E), F) - Ru-Isq -  $[\text{HIsq}][\text{trans-RuCl}_4(\text{Isq})(\text{DMSO})]$  in medium with serum (S+) and without serum (S-) after 24 h or 48 h of incubation.

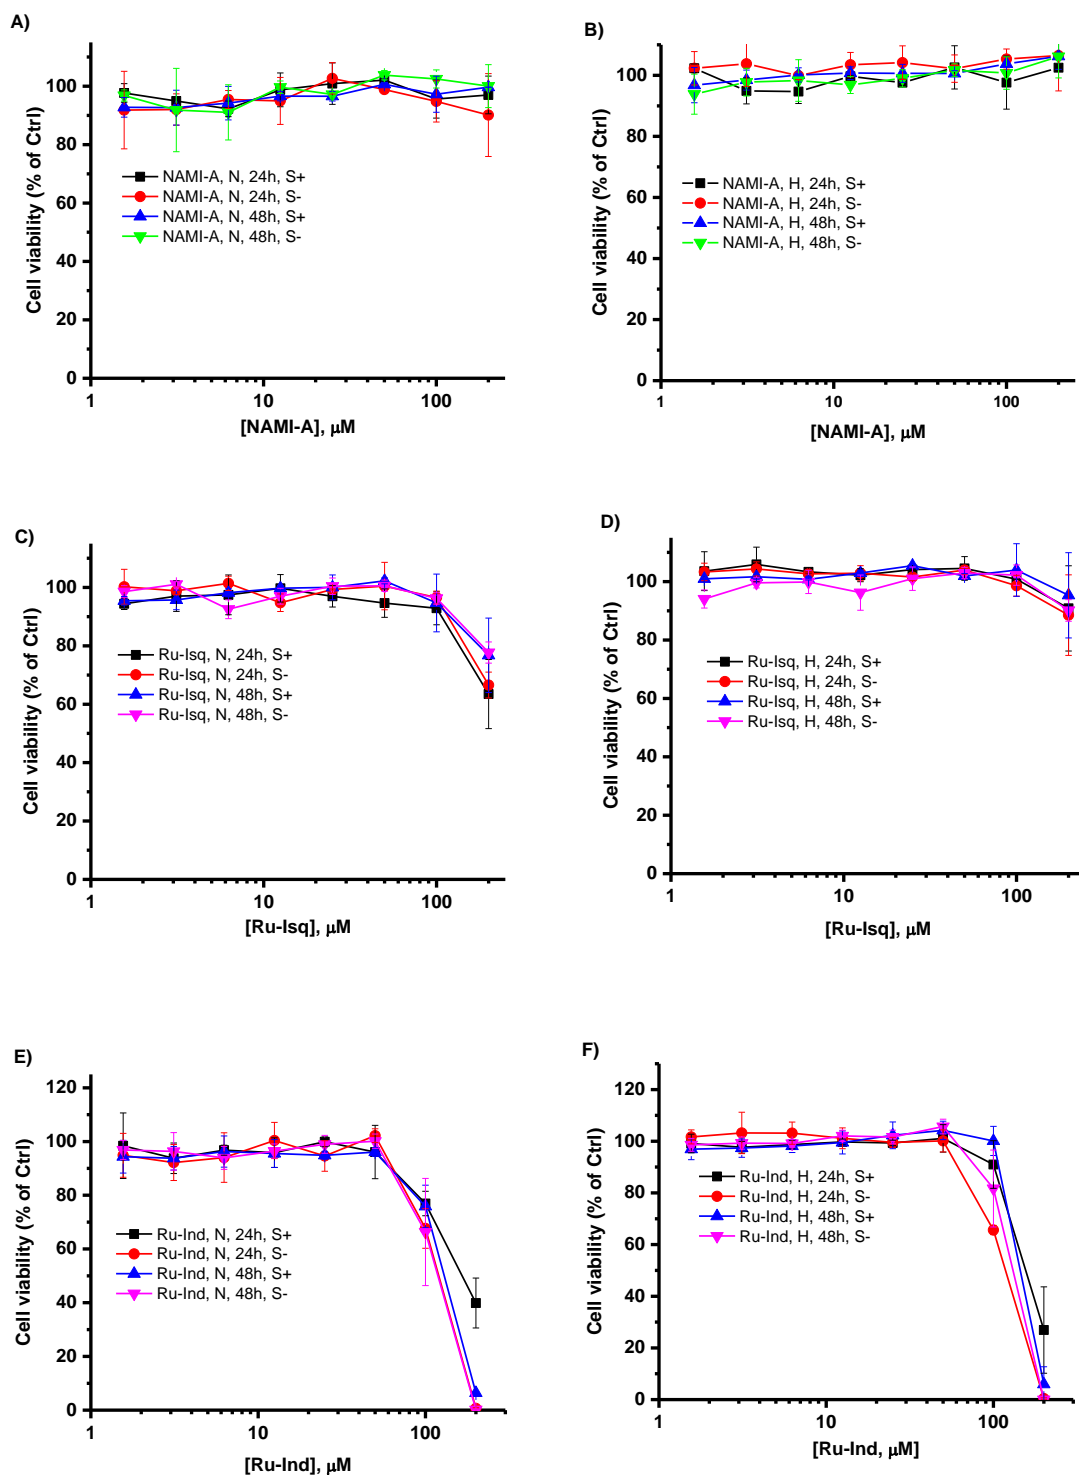

**Fig S2.** Cytotoxic effect of studied compounds on HPEC-CB.2. in A), C) and E) normoxic (N) and B), D) and F) hypoxic (H) conditions, A), B) - NAMI-A - [H<sub>2</sub>Im][*trans*-RuCl<sub>4</sub>(HIm)(DMSO)], C), D) - Ru-Isq - [HIsq][*trans*-RuCl<sub>4</sub>(Isq)(DMSO)], E), F) - Ru-Ind - [H<sub>2</sub>Ind][*trans*-RuCl<sub>4</sub>(HInd)(DMSO)] in medium with serum (S+) and without serum (S-) after 24 h or 48 h of incubation.

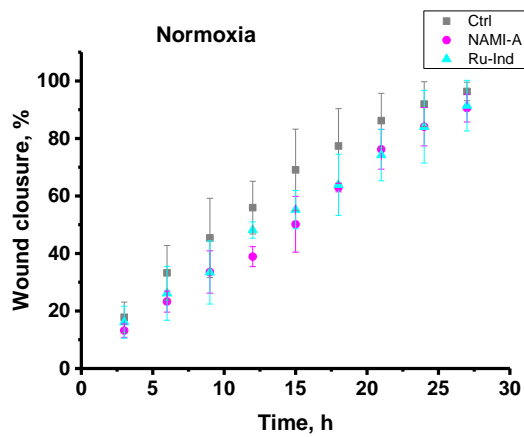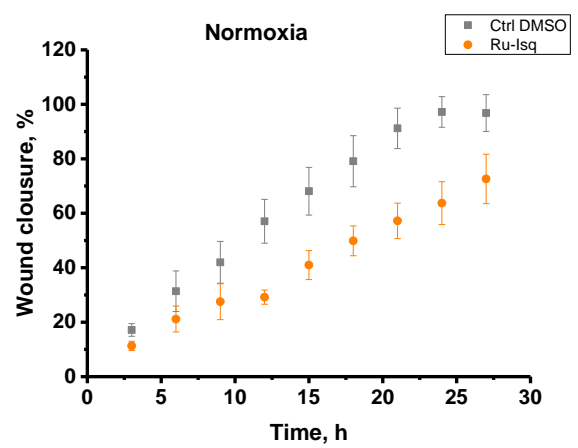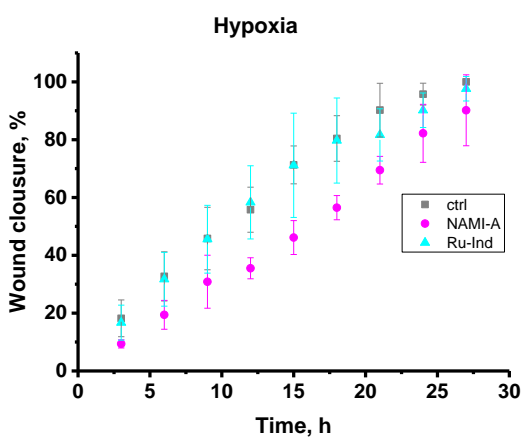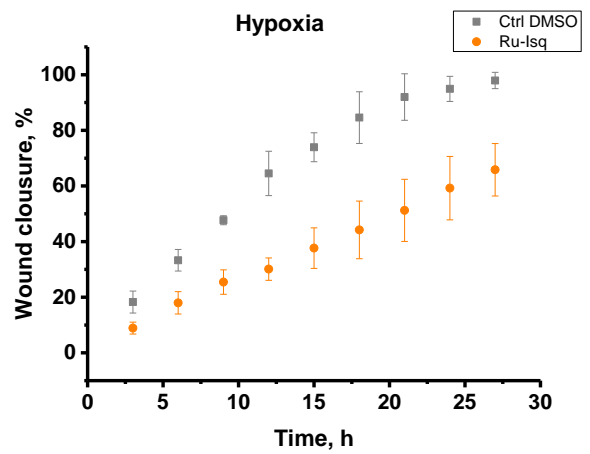

**Fig S3.** Time dependent effect of studied compounds on HSkMEC migration representing by time vs. confluence function curves. A), C) - NAMI-A -  $[\text{H}_2\text{Im}][\text{trans-RuCl}_4(\text{HIm})(\text{DMSO})]$ , and Ru-Ind -  $[\text{H}_2\text{Ind}][\text{trans-RuCl}_4(\text{HInd})(\text{DMSO})]$ ; B), D) - Ru-Isq -  $[\text{HIsq}][\text{trans-RuCl}_4(\text{Isq})(\text{DMSO})]$ .
